# Supplementary material
Source: publisher site journal article supplement (https://www.dovepress.com/article/286665)
Supplement: Supplementary file 1 [file get_supplementary_file.php]

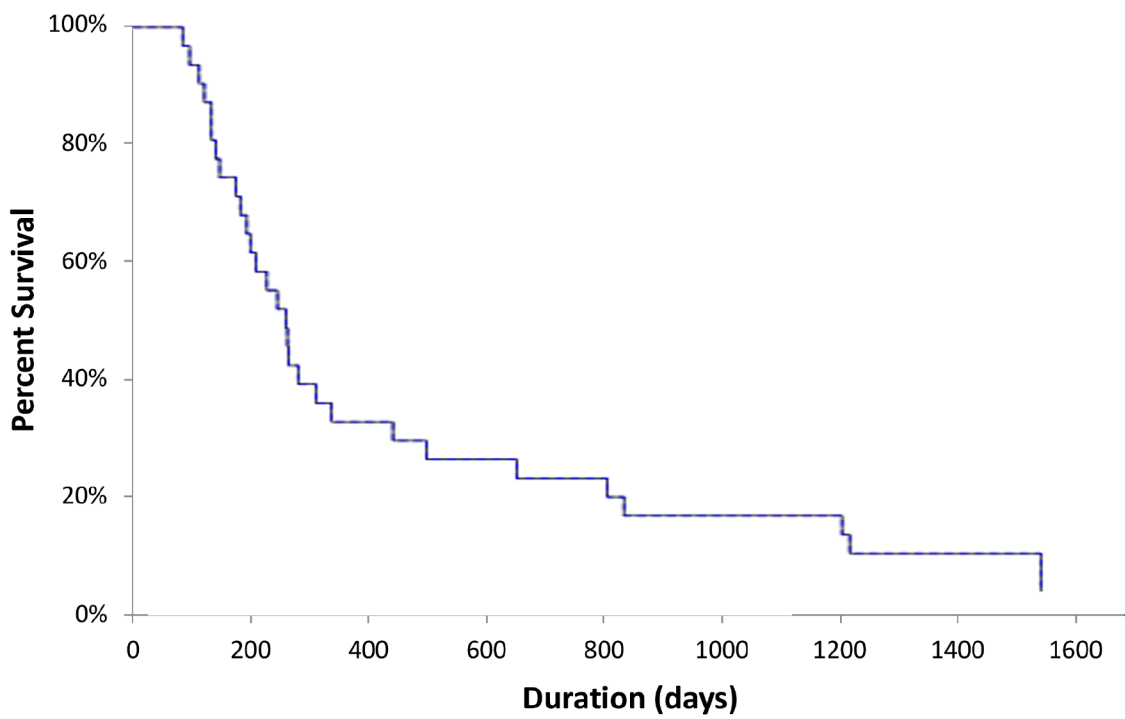

**Supplemental Figure 1.** Kaplan-Meier Curves of Time to IVA Conversion. Survival was determined as the percentage of eyes that have not switched to IVA following IVB/IVR treatment. Fifty percent of eyes converted to IVA after 252 days.

**Supplemental Table 1: Vision and Anatomical Characteristics**

| Visual Acuity at Baseline         | Mean <sup>†</sup> (SD) | Significance |
|-----------------------------------|------------------------|--------------|
| All switch patients (n=30)        | 0.61 (0.49)            |              |
| Early-switch (n=18)               | 0.60 (0.46)            | §p=0.962     |
| Late-switch (n=12)                | 0.61 (0.56)            |              |
| Reference (n=19)                  | 0.52 (0.30)            | ¶p=0.471     |
| Visual Acuity at Switch           | Mean <sup>†</sup> (SD) | Significance |
| All switch patients               | 0.56 (0.32)            |              |
| Early-switch                      | 0.60 (0.32)            | §p=0.490     |
| Late-switch                       | 0.51 (0.31)            |              |
| Reference                         | 0.35 (0.26)            | ¶p=0.020     |
| Visual Acuity at End of Follow-up | Mean <sup>†</sup> (SD) | Significance |
| All switch patients               | 0.47 (0.31)            |              |
| Early-switch                      | 0.45 (0.31)            | §p=0.539     |
| Late-switch                       | 0.52 (0.31)            |              |
| Reference                         | 0.27 (0.15)            | ¶p=0.011     |
| CRT at Baseline                   | Mean <sup>‡</sup> (SD) | Significance |
| All switch patients               | 433 (106)              |              |
| Early-switch                      | 412 (73)               | §p=0.183     |
| Late-switch                       | 465 (140)              |              |
| Reference                         | 510 (176)              | ¶p=0.062     |
| CRT at Switch                     | Mean <sup>‡</sup> (SD) | Significance |
| All switch patients               | 364 (96)               |              |
| Early-switch                      | 382 (114)              | §p=0.191     |
| Late-switch                       | 335 (52)               |              |
| Reference                         | 383 (124)              | ¶p=0.542     |
| CRT at End of Follow-up           | Mean <sup>‡</sup> (SD) | Significance |
| All switch patients               | 292 (73)               |              |
| Early-switch                      | 306 (81)               | §p=0.206     |
| Late-switch                       | 271 (56)               |              |
| Reference                         | 321 (92)               | ¶p=0.225     |

<sup>†</sup>Visual acuity presented in LogMAR.

<sup>‡</sup>CRT measured in microns by spectral-domain OCT.

<sup>§</sup>p-value calculated for the early- versus late-switch groups.

<sup>¶</sup>p-value calculated for the reference versus the all-switch groups.

**Supplemental Table 2.** Number of injections, treatment duration, and injection interval

| <b>Pre-switch Injections</b>                  | <b>Mean (SD)</b> | <b>Median</b> | <b>Range</b> | <b>Significance</b> |
|-----------------------------------------------|------------------|---------------|--------------|---------------------|
| <b>All switch patients (n=30)</b>             | 11.9 (12.9)      | 6             | 3-47         |                     |
| <b>Early-switch (n=18)</b>                    | 4.56 (1.20)      | 5             | 3-6          | § <i>p</i> <0.001   |
| <b>Late-switch (n=12)</b>                     | 23.0 (14.6)      | 20            | 8-47         |                     |
| <b>Reference</b>                              | 4.26 (0.45)      | 4             | 4-5          | ¶ <i>p</i> =0.013   |
| <b>Post-switch Injections</b>                 | <b>Mean (SD)</b> | <b>Median</b> | <b>Range</b> | <b>Significance</b> |
| <b>All switch patients</b>                    | 6.43 (4.34)      | 5.5           | 3-19         |                     |
| <b>Early-switch</b>                           | 6.44 (4.82)      | 5             | 3-19         | § <i>p</i> =0.987   |
| <b>Late-switch</b>                            | 6.41 (3.70)      | 6             | 3-16         |                     |
| <b>Reference</b>                              | 5.58 (0.96)      | 6             | 4-7          | ¶ <i>p</i> =0.404   |
| <b>Total Injections</b>                       | <b>Mean (SD)</b> | <b>Median</b> | <b>Range</b> | <b>Significance</b> |
| <b>All switch patients</b>                    | 18.4 (14.4)      | 12            | 6-55         |                     |
| <b>Early-switch</b>                           | 11.0 (5.25)      | 9.5           | 6-25         | § <i>p</i> <0.001   |
| <b>Late-switch</b>                            | 29.4 (16.8)      | 24            | 11-55        |                     |
| <b>Reference</b>                              | 9.84 (1.26)      | 10            | 8-12         | ¶ <i>p</i> =0.014   |
| <b>Pre-switch Treatment Duration (days)</b>   | <b>Mean (SD)</b> | <b>Median</b> | <b>Range</b> | <b>Significance</b> |
| <b>All switch patients</b>                    | 428 (427)        | 252           | 84-1540      |                     |
| <b>Early-switch</b>                           | 181 (66)         | 178.5         | 84-310       | § <i>p</i> <0.001   |
| <b>Late-switch</b>                            | 798 (475)        | 728           | 245-1540     |                     |
| <b>Reference</b>                              | 171 (29)         | 171           | 119-231      | ¶ <i>p</i> =0.012   |
| <b>Post-switch Treatment Duration (days)</b>  | <b>Mean (SD)</b> | <b>Median</b> | <b>Range</b> | <b>Significance</b> |
| <b>All switch patients</b>                    | 228 (144)        | 203           | 62-576       |                     |
| <b>Early-switch</b>                           | 224 (150)        | 203           | 62-574       | § <i>p</i> =0.844   |
| <b>Late-switch</b>                            | 235 (141)        | 221.5         | 62-576       |                     |
| <b>Reference</b>                              | 205 (34)         | 205           | 136-255      | ¶ <i>p</i> =0.500   |
| <b>Total Treatment Duration (days)</b>        | <b>Mean (SD)</b> | <b>Median</b> | <b>Range</b> | <b>Significance</b> |
| <b>All switch patients</b>                    | 656 (487)        | 493           | 146-1855     |                     |
| <b>Early-switch</b>                           | 405 (189)        | 345           | 146-884      | § <i>p</i> <0.001   |
| <b>Late-switch</b>                            | 1032 (560)       | 882           | 343-1855     |                     |
| <b>Reference</b>                              | 376 (55)         | 389           | 255-469      | ¶ <i>p</i> =0.017   |
| <b>Pre-switch Injection Interval (weeks)</b>  | <b>Mean (SD)</b> | <b>Median</b> | <b>Range</b> | <b>Significance</b> |
| <b>All switch patients</b>                    | 5.42 (1.12)      | 4.99          | 4-8          |                     |
| <b>Early-switch</b>                           | 5.64 (1.28)      | 5.33          | 4-8          | § <i>p</i> =0.191   |
| <b>Late-switch</b>                            | 5.09 (0.77)      | 4.75          | 4.38-6.47    |                     |
| <b>Reference</b>                              | 5.76 (1.07)      | 5.75          | 4.17-8.25    | ¶ <i>p</i> =0.057   |
| <b>Post-switch Injection Interval (weeks)</b> | <b>Mean (SD)</b> | <b>Median</b> | <b>Range</b> | <b>Significance</b> |
| <b>All switch patients</b>                    | 6.45 (1.84)      | 5.97          | 4.38-11.5    |                     |
| <b>Early-switch</b>                           | 6.42 (1.95)      | 5.77          | 4.38-10.1    | § <i>p</i> =0.898   |
| <b>Late-switch</b>                            | 6.51 (1.75)      | 6.15          | 4.43-11.5    |                     |
| <b>Reference</b>                              | 6.58 (1.40)      | 5.86          | 4.89-9.11    | ¶ <i>p</i> =0.590   |

§*p*-value calculated for the early- versus late-switch groups.

¶*p*-value calculated for the reference versus the all-switch groups.
